# Supplementary material for: High-yield synthesis of ultrathin silica-based nanosheets and their superior catalytic activity in H2O2 decomposition
Source: Royal Society of Chemistry journal article supplement (doi:10.1039/c1cc10280j), 2011-01-01
Supplement: c1cc10280j.pdf [file c1cc10280j.pdf]

Electronic Supplementary Information for

**High-yield synthesis of ultrathin silica-based nanosheets and their superior catalytic activity  
in H<sub>2</sub>O<sub>2</sub> decomposition**

Jiehua Liu,<sup>a</sup> Xiangfeng Wei,<sup>a</sup> Xin Wang<sup>b</sup> and Xue-Wei Liu\*<sup>a</sup>

<sup>a</sup> *Division of Chemistry and Biological Chemistry, School of Physical & Mathematical Sciences, Nanyang Technological University, 21 Nanyang Link, 637371 Singapore Email: [xuwei@ntu.edu.sg](mailto:xuwei@ntu.edu.sg)*

<sup>b</sup> *School of Chemical and Biomedical Engineering, Nanyang Technological University Singapore 639798 Singapore*

## Experimental Section

### Preparation of ultrathin CSO nanosheets

In a typical method, 0.74 g of  $\text{Co}(\text{CH}_3\text{COO})_2 \cdot 4\text{H}_2\text{O}$  was dissolved into 10 g of N,N-dimethylethanolamine (DMEA) and then 8.3 g of tetraethyl orthosilicate was added. After a homogeneous system obtained, 5 mL of water was added into the above obtained solution. The sol-gel could be formed after 5 min at 50 °C with the aid of ultrasonic and then transferred into Teflon-lined stainless steel reactor, which is heated at 160 °C for 24 hours. After reaction, the obtained cobalt doped silica (CSO) was dried at 150 °C and then annealed at 300-500 °C for 2 hours.

### Preparation of Pt loaded CSO nanosheets

The Pt loaded CSO sample (PCSO) could be synthesized in situ as same as the synthesis of CSO nanosheets.  $\text{H}_2\text{PtCl}_6$  was first dissolved into the DMEA. Following this, 0.74 g of  $\text{Co}(\text{CH}_3\text{COO})_2 \cdot 4\text{H}_2\text{O}$  was dissolved into 10 g of DMEA and then 8.3 g of tetraethyl orthosilicate was added. After a homogeneous system obtained, 5 mL of water was added into the above obtained solution. The sol-gel could be also formed with the help of ultrasonic and then transferred into Teflon-lined stainless steel reactor, which is heated at 160 °C for 24 hours. After reaction, the obtained PCSO sample was dried at 150 °C and then annealed at 300-500 °C for 2 hours.

### Characterization

XRD patterns were performed with a D8 diffractometer with Cu-K $\alpha$  radiation ( $\lambda = 1.54056 \text{ \AA}$ ). TEM images were obtained with JEOL JEM-1400 and JEOL 2100F at 120 and 200 kV respectively.  $\text{N}_2$  adsorption-desorption isotherms were conducted at 77 K on a Micromeritics Tristar 3000 analyzer. The BET surface areas and pore-volume distribution curves were calculated using adsorption data by DFT method. X-ray photoelectron spectroscopic (XPS, KRATOS, AXIS ULTRA) measurements were carried out by using a monochromated Al K $\alpha$  (1486.7 eV) X-ray source at power of 150 W (15 kV  $\times$  10 mA). The XPS analysis was carried out at room temperature under a typical pressure in the range of  $4.0 \times 10^{-7}$  –  $8.0 \times 10^{-7}$  Pa, at take-off angle relative to the surface holder of 90°. A charge neutralizer was employed

to neutralize charge accumulation during the analysis. Each sample was measured before and after argon ion etching at 4.0 kV and 15 mA for 5 min to remove possible surface contaminants.

### **H<sub>2</sub>O<sub>2</sub> Decomposition:**

In a typical experiment, CSO or PCSO (2-10 mg) was added into a 50 mL round-bottomed flask with 30 mL of 3wt% H<sub>2</sub>O<sub>2</sub> solution and stirred at 294 K. The volume of oxygen was measured by a closed U-tube pressure-balanced system. The scheme of apparatus equipped for volumetric measurement is provided in Supporting Information (Scheme S1).

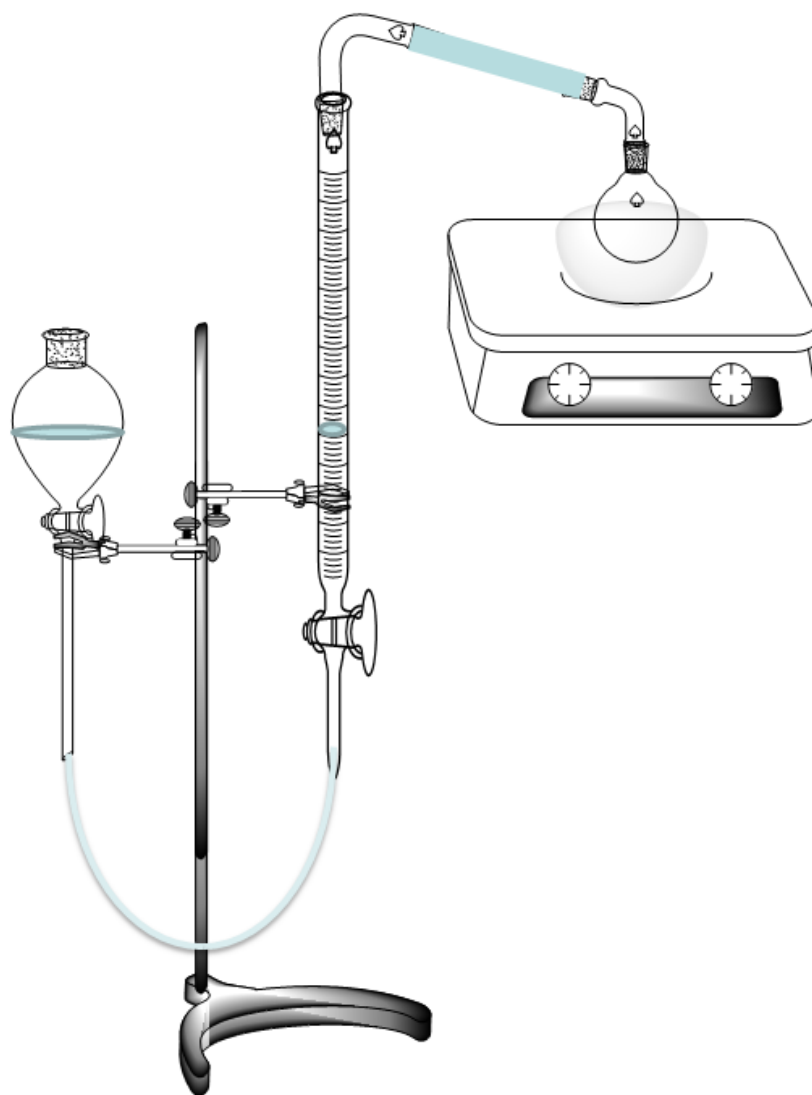

**Scheme S1:** The O<sub>2</sub> volume measuring apparatus for H<sub>2</sub>O<sub>2</sub> decomposition experiments. The left tube can be regulated to keep the H<sub>2</sub>O level as high as that in right tube.

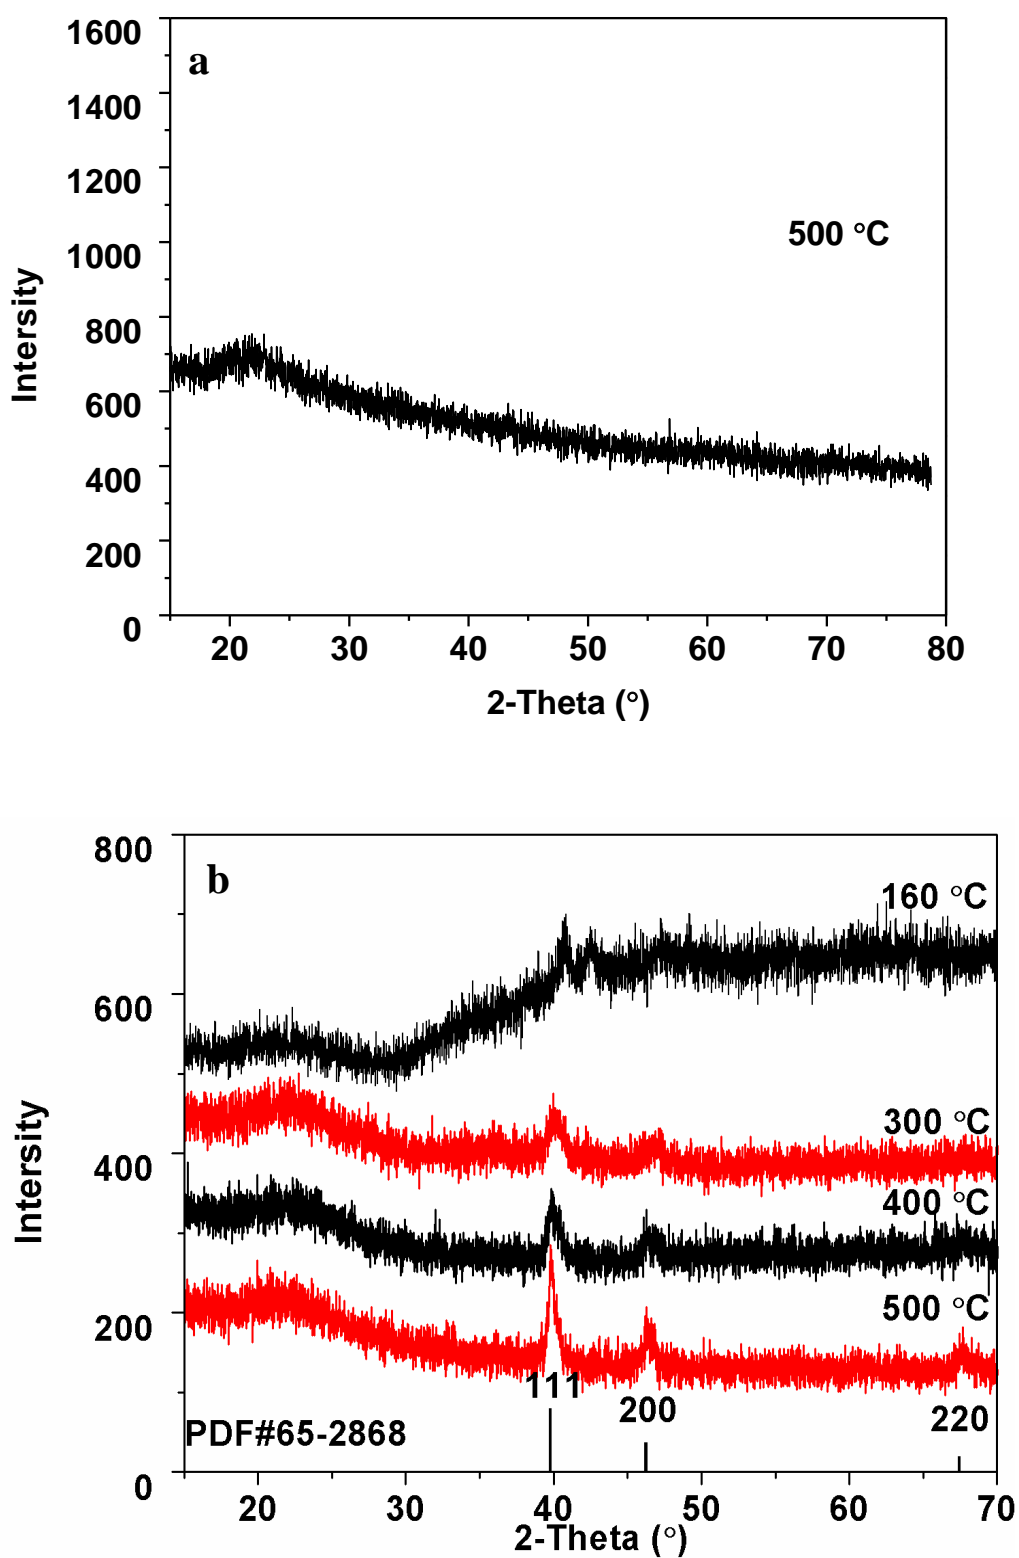

**Figure S1:** (a) XRD pattern of CSO annealed at 500 °C; (b) XRD patterns of PCSO annealed at different temperature.

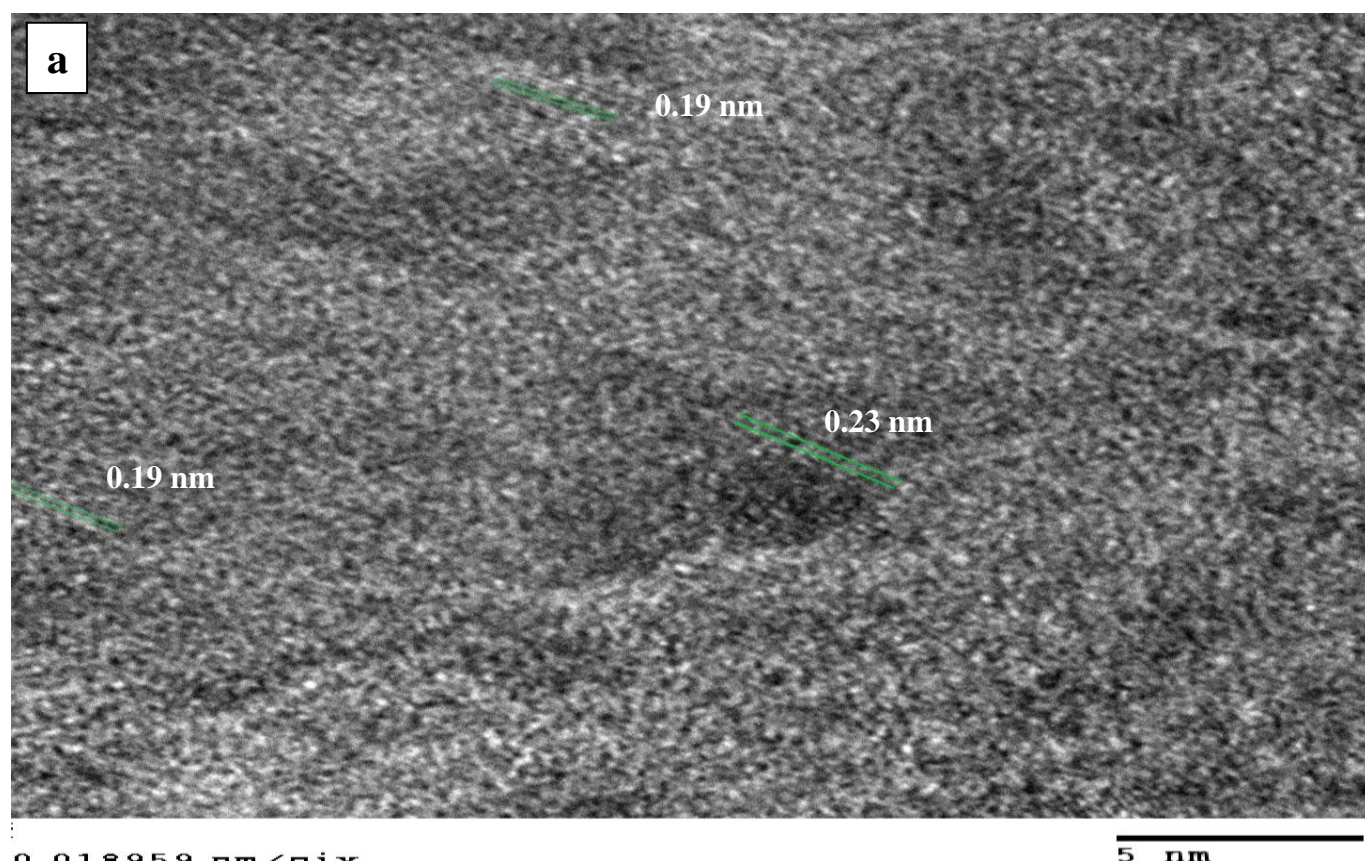

**Figure S2:** HRTEM image of PCSO sample

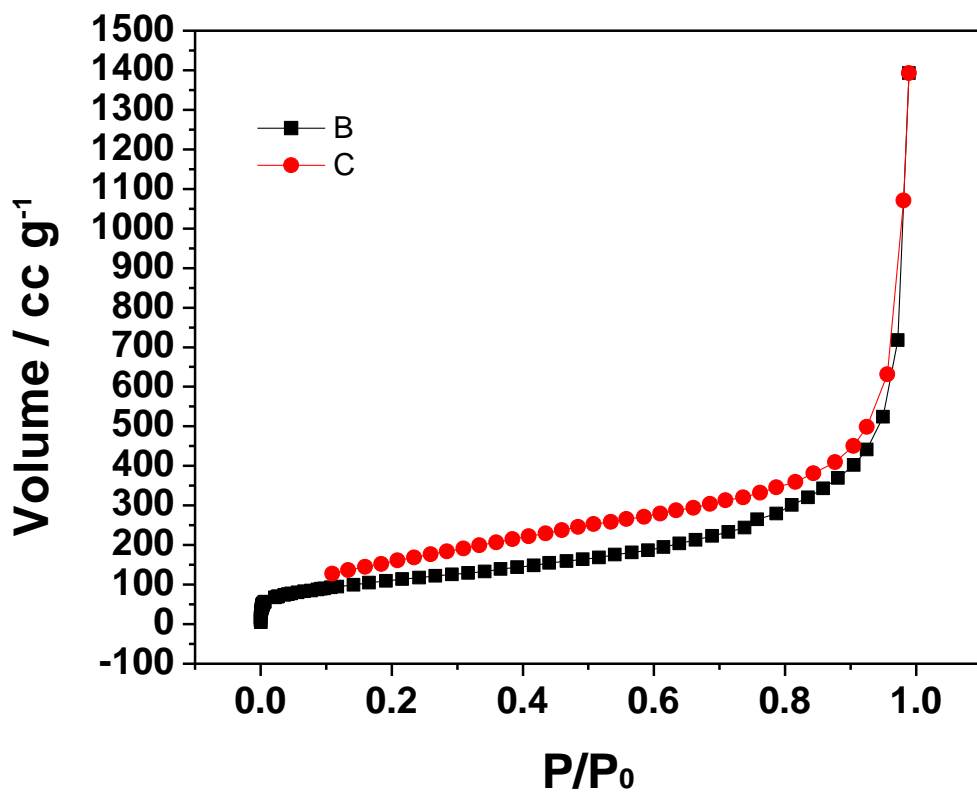

Figure S3: Nitrogen adsorption-desorption pattern of PCSO nanosheets.

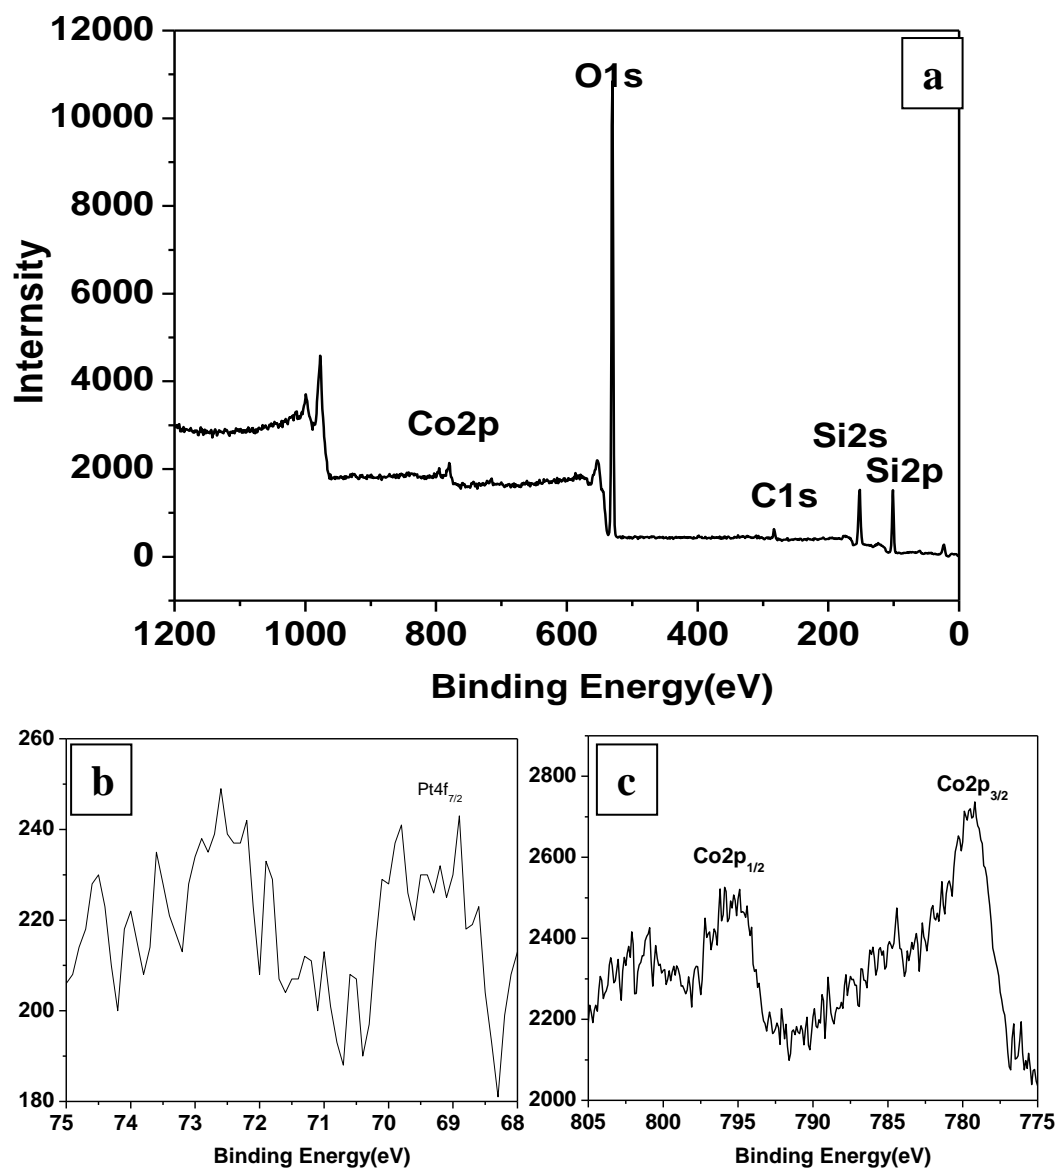

**Figure S4:** XPS spectra (a) of PCSO (~0.4wt% loaded on CSO nanosheets) and the detail analyses of Pt (b) and Co (c).
